# Supplementary material
Source: PubMed Central journal article supplement (PMC6233773)
Supplement: jamaoncol-4-1375-s001.pdf [file jamaoncol-4-1375-s001.pdf]

## Supplementary Online Content

Johnson SB, Park HS, Gross CP, Yu JB. Complementary medicine, refusal of conventional cancer therapy, and survival among patients with curable cancers. *JAMA Oncol*. Published online July 19, 2018. doi:10.1001/jamaoncol.2018.2487

**eTable 1.** Characteristics of Patients With Breast, Prostate, Lung and Colorectal Cancer

**eTable 2.** Logistic Regression of Covariates Associated With Selection of Complementary Medicine Clustered by Facility Type

**eTable 3.** Patient Characteristics of 4:1 Matched Groups

This supplementary material has been provided by the authors to give readers additional information about their work.

**eTable 1.** Characteristics of Patients With Breast, Prostate, Lung and Colorectal Cancer

| Characteristics                 | No Complementary Medicine,<br>No. (%) | Complementary<br>Medicine, No. (%) |
|---------------------------------|---------------------------------------|------------------------------------|
| Total                           | 1,901,557 (99.99%)                    | 258 (0.01%)                        |
| Mean age (inter-quartile range) | 62 (55-71)                            | 56 (48-64)                         |
| Cancer Type                     |                                       |                                    |
| Breast                          | 732,050 (38.5%)                       | 186 (72.1%)                        |
| Prostate                        | 724,521 (38.1%)                       | 27 (10%)                           |
| Lung                            | 291,381 (15.3%)                       | 15 (6%)                            |
| Colorectal                      | 153,605 (8.1%)                        | 30 (12%)                           |
| Gender                          |                                       |                                    |
| Male                            | 973,315 (51.2%)                       | 59 (23%)                           |
| Female                          | 928,242 (48.8%)                       | 199 (77.1%)                        |
| Race                            |                                       |                                    |
| White                           | 1,510,216 (79.4%)                     | 209 (81.0%)                        |
| Black                           | 226,470 (11.9%)                       | 18 (7%)                            |
| Hispanic                        | 75,988 (4.0%)                         | 10 (4%)                            |
| Other                           | 88,883 (4.7%)                         | 21 (8%)                            |
| Income*                         |                                       |                                    |
| <\$48,000                       | 726,517 (38.6%)                       | 82 (32%)                           |
| ≥\$48,000                       | 1,155,676 (61.4%)                     | 171 (67.6%)                        |
| Education†                      |                                       |                                    |
| <80% HSE                        | 685,740 (37.4%)                       | 67 (27%)                           |
| ≥80% HSE                        | 1,148,261 (62.6%)                     | 179 (72.8%)                        |
| Residence Setting               |                                       |                                    |
| Metropolitan                    | 1,548,073 (84.0%)                     | 215 (88.1%)                        |
| Non-metropolitan                | 295,409 (16.0%)                       | 29 (12%)                           |
| Geographic area                 |                                       |                                    |
| Northeast                       | 383,822 (20.8%)                       | 26 (11%)                           |
| South Atlantic                  | 412,057 (22.3%)                       | 39 (16%)                           |
| Midwest                         | 490,117 (26.5%)                       | 49 (20%)                           |
| South                           | 252,657 (13.7%)                       | 11 (5%)                            |
| Intermountain West              | 80,789 (4.4%)                         | 26 (11%)                           |
| Pacific                         | 228,993 (12.4%)                       | 94 (38%)                           |
| Insurance Type                  |                                       |                                    |
| None                            | 42,381 (2.2%)                         | #                                  |
| Private                         | 943,203 (49.6%)                       | 174 (67.4%)                        |
| Medicaid                        | 88,220 (4.6%)                         | 20 (8%)                            |
| Medicare                        | 773,958 (40.7%)                       | 56 (22%)                           |
| Government/Unknown              | 53,795 (2.8%)                         | #                                  |
| Facility Type                   |                                       |                                    |
| Academic                        | 610,061 (36.8%)                       | 94 (43%)                           |
| Community                       | 1,049,395 (63.2%)                     | 127 (57.5%)                        |
| Clinical Stage                  |                                       |                                    |
| I                               | 699,627 (36.8%)                       | 110 (42.6%)                        |
| II                              | 925,393 (48.7%)                       | 94 (36%)                           |
| III                             | 276,537 (14.5%)                       | 54 (21%)                           |
| Charlson-Deyo Comorbidity       |                                       |                                    |
| 0                               | 1,531,339 (80.5%)                     | 237 (91.9%)                        |
| 1                               | 293,306 (15.4%)                       | 19 (7%)                            |
| ≥2                              | 76,912 (4.1%)                         | #                                  |

\* Income is expressed as median household income by zip code of residence. Abbreviations: HSE-High school education

† Education is expressed as the percentage of residents by zip code receiving a high school diploma

# Values with n<10 are not reported

**eTable 2.** Logistic Regression of Covariates Associated With Selection of Complementary Medicine Clustered by Facility Type

| Variables                 | Odds Ratio* (95%CI) | P Value† |
|---------------------------|---------------------|----------|
| Age, continuous           | 0.97 (0.95-0.98)    | <.001    |
| Cancer Type               |                     |          |
| Prostate                  | 1.00 (Reference)    |          |
| Breast                    | 7.26 (3.29-16.02)   | <.001    |
| Lung                      | 1.28 (0.56-2.95)    | .56      |
| Colorectal                | 4.20 (2.23-7.95)    | <.001    |
| Gender                    |                     |          |
| Male                      | 1.00 (Reference)    |          |
| Female                    | 0.71 (0.38-1.36)    | .30      |
| Race                      |                     |          |
| White                     | 1.00 (Reference)    |          |
| Black                     | 0.59 (0.32-1.11)    | .10      |
| Hispanic                  | 0.57 (0.28-1.17)    | .13      |
| Other                     | 0.96 (0.56-1.65)    | .88      |
| Income‡                   |                     |          |
| <\$48,000                 | 1.00 (Reference)    |          |
| >\$48,000                 | 0.78 (0.55-1.12)    | .18      |
| Education§                |                     |          |
| <80% HSE                  | 1.00 (Reference)    |          |
| ≥80% HSE                  | 1.30 (0.90-1.87)    | .16      |
| Residence Setting         |                     |          |
| Metropolitan              | 1.00 (Reference)    |          |
| Non-metropolitan          | 0.96 (0.61-1.53)    | .87      |
| Geographic area           |                     |          |
| Northeast                 | 1.00 (Reference)    |          |
| South Atlantic            | 1.46 (0.74-2.90)    | .28      |
| Midwest                   | 1.15 (0.61-2.18)    | .67      |
| South                     | 0.46 (0.17-1.22)    | .12      |
| Intermountain West        | 4.65 (2.03-10.64)   | <.001    |
| Pacific                   | 6.61 (3.54-12.37)   | <.001    |
| Insurance Type            |                     |          |
| None                      | 1.00 (Reference)    |          |
| Private                   | 0.95 (0.38-2.37)    | .92      |
| Medicaid                  | 1.26 (0.47-3.43)    | .65      |
| Medicare                  | 0.88 (0.33-2.34)    | .80      |
| Government/Unknown        | 0.30 (0.06-1.57)    | .15      |
| Facility Type             |                     |          |
| Community                 | 1.00 (Reference)    |          |
| Academic                  | 1.88 (1.22-2.90)    | .004     |
| Clinical Stage            |                     |          |
| I                         | 1.00 (Reference)    |          |
| II                        | 0.96 (0.69-1.34)    | .82      |
| III                       | 1.68 (1.12-2.51)    | .012     |
| Charlson-Devo Comorbidity |                     |          |
| 0                         | 1.00 (Reference)    |          |
| 1                         | 0.51 (0.29-0.90)    | .020     |
| >2                        | 0.17 (0.02-1.25)    | .082     |

\* Multivariate model. Abbreviations: CI=confidence interval; HSE=High school education.

† P values were calculated by a two-sided multivariable logistic regression

‡ Income is expressed as median household income by zip code of residence

§ Education is expressed as the percentage of residents by zip code receiving a high school

| <b>eTable 3. Patient Characteristics of 4:1 Matched Groups</b> |              |                                 |                             |         |
|----------------------------------------------------------------|--------------|---------------------------------|-----------------------------|---------|
|                                                                | Total, 1290  | No Complementary Medicine, 1032 | Complementary Medicine, 258 | P Value |
| Mean age (range)                                               | 56 (23-90)   | 56 (23-90)                      | 56 (24-87)                  | .80*    |
| Cancer                                                         |              |                                 |                             | 1.0**   |
| Breast                                                         | 930 (72.1%)  | 744 (80.0%)                     | 186 (20.0%)                 |         |
| Prostate                                                       | 135 (10.5%)  | 108 (80.0%)                     | 27 (20.0%)                  |         |
| Lung                                                           | 75 (6%)      | 60 (80.0%)                      | 15 (20.0%)                  |         |
| Colorectal                                                     | 150 (11.6%)  | 120 (80.0%)                     | 30 (20.0%)                  |         |
| Gender                                                         |              |                                 |                             | .95**   |
| Male                                                           | 293 (22.7%)  | 234 (22.7%)                     | 59 (22.9%)                  |         |
| Female                                                         | 997 (77.3%)  | 798 (77.3%)                     | 997 (77.1%)                 |         |
| Race                                                           |              |                                 |                             | .82**   |
| White                                                          | 1050 (81.4%) | 841 (81.5%)                     | 209 (81.0%)                 |         |
| Black                                                          | 102 (7.9%)   | 84 (8%)                         | 18 (7%)                     |         |
| Hispanic                                                       | 46 (3.6%)    | 36 (4%)                         | 10 (4%)                     |         |
| Other                                                          | 92 (7.1%)    | 71 (7%)                         | 21 (8%)                     |         |
| Income <sup>a</sup>                                            |              |                                 |                             | .33**   |
| <\$47,999                                                      | 445 (35.0 %) | 363 (35.7%)                     | 82 (32%)                    |         |
| ≥\$48,000                                                      | 825 (65.0%)  | 654 (64.3%)                     | 171 (67.6%)                 |         |
| Education <sup>b</sup>                                         |              |                                 |                             | .008**  |
| <80% HSE                                                       | 426 (34.4%)  | 359 (36.2%)                     | 67 (27%)                    |         |
| ≥80% HSE                                                       | 811 (65.6%)  | 632 (63.8%)                     | 179 (72.8%)                 |         |
| Residence Setting                                              |              |                                 |                             | .22**   |
| Metropolitan                                                   | 1060 (85.6%) | 845 (85.0%)                     | 215 (88.1%)                 |         |
| Non-metropolitan                                               | 178 (14.4%)  | 149 (15.0%)                     | 29 (12%)                    |         |
| Geographic area                                                |              |                                 |                             | <.001** |
| Northeast                                                      | 216 (17.7%)  | 190 (19.5%)                     | 26 (11%)                    |         |
| South Atlantic                                                 | 218 (17.9%)  | 179 (18.4%)                     | 39 (16%)                    |         |
| Midwest                                                        | 325 (26.6%)  | 276 (28.3%)                     | 49 (20%)                    |         |
| South                                                          | 149 (12.2%)  | 138 (14.1%)                     | 11 (5%)                     |         |
| Intermountain West                                             | 73 (6.0%)    | 47 (5%)                         | 26 (11%)                    |         |
| Pacific                                                        | 239 (19.6%)  | 145 (14.9%)                     | 94 (38%)                    |         |
| Insurance Type                                                 |              |                                 |                             | .94**   |
| None                                                           | 27 (2.1%)    | 21 (2%)                         | 6 (2%)                      |         |
| Private                                                        | 879 (68.1%)  | 705 (68.3%)                     | 174 (67.4%)                 |         |
| Medicaid                                                       | 98 (7.6%)    | 78 (8%)                         | 20 (8%)                     |         |
| Medicare                                                       | 280 (21.7%)  | 224 (21.7%)                     | 56 (22%)                    |         |
| Government/Unknown                                             | 6 (0.5%)     | 4 (1%)                          | 2 (1%)                      |         |
| Facility Type                                                  |              |                                 |                             | .035**  |
| Community                                                      | 700 (63.6%)  | 573 (65.1%)                     | 127 (57.5%)                 |         |
| Academic                                                       | 401 (36.4%)  | 307 (34.9%)                     | 94 (43%)                    |         |
| Clinical Stage                                                 |              |                                 |                             | .93**   |
| I                                                              | 546 (42.3%)  | 436 (42.3%)                     | 110 (42.6%)                 |         |
| II                                                             | 482 (37.4%)  | 388 (37.6%)                     | 94 (36%)                    |         |
| III                                                            | 262 (20.3%)  | 208 (20.1%)                     | 54 (21%)                    |         |
| Charlson-Deyo Comorbidity                                      |              |                                 |                             | .95**   |
| 0                                                              | 1179 (91.4%) | 942 (91.3%)                     | 237 (91.9%)                 |         |
| 1                                                              | 101 (7.8%)   | 82 (8%)                         | 19 (7%)                     |         |
| ≥2                                                             | 10 (0.8%)    | 8 (1%)                          | 2 (1%)                      |         |
| *t test                                                        |              |                                 |                             |         |
| **Chi square                                                   |              |                                 |                             |         |
| Abbreviations: HSE-High school education                       |              |                                 |                             |         |
